# Supplementary material for: Proton-conducting electrolyte film of double-decker-shaped polyhedral silsesquioxane containing covalently bonded phosphonic acid groups
Source: Royal Society of Chemistry journal article supplement (doi:10.1039/c2jm15779a), 2012-01-01
Supplement: c2jm15779a.pdf [file c2jm15779a.pdf]

# Proton-conducting Electrolyte Film of Double-decker-shaped Polyhedral Silsesquioxane Containing Covalently Bonded Phosphonic Acid Groups

*Asuman C. Kucuk, Jun Matsui\*, and Tokuji Miyashita*

Institute of Multidisciplinary Research for Advanced Materials (IMRAM), Tohoku

University, 2-1-1

Katahira, Aoba-ku, Sendai 980-8577, Japan

Author to whom correspondence should be addressed

e-mail: [jun\\_m@tagen.tohoku.ac.jp](mailto:jun_m@tagen.tohoku.ac.jp)

### **Instrumental Analysis.**

FT-IR spectra were obtained using an FT-IR spectrometer (FT/IR4200; Jasco Corp.). The IR spectra of the amphiphilic DDSQs were recorded between 4000 and 900  $\text{cm}^{-1}$  with resolution of 1  $\text{cm}^{-1}$  under a continuous nitrogen purge. Then  $^1\text{H}$  and  $^{31}\text{P}$  NMR measurements were conducted using a spectrometer (JNM-AL 400; JEOL).

For MALDI-TOF MS (Bruker Daltonics) Analysis, the matrix  $\alpha$ -cyano-4-hydroxycinnamic acid was dissolved in THF (10 mg  $\text{ml}^{-1}$ ), and mixed with 0.2  $\mu\text{L}$  of sample solution (100  $\mu\text{mol}$  in THF) in 1:1 v/v ratio. The resultant solution was deposited on a stainless steel sample plate and dried. The measurement was done in linear mode with a N2 laser (337 nm), and positive mode with an accelerating voltage 20 kV.

X-ray photoelectron spectrometer (XPS) (PHI 5600; Perkin-Elmer Inc.) was used to determine the element composition of the compounds. All binding energies in XPS measurements were referenced to the C 1s peak for neutral carbon, which was assigned as a value of 285.0 eV.

## Experimental Results

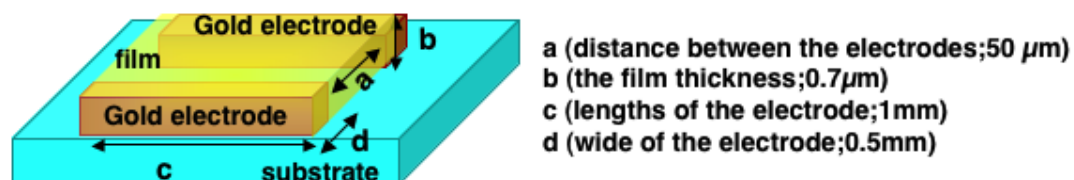

**Figure S1** Glass substrate, where gold electrode is patterned, used for proton conductivity measurement for drop cast film of PHOS-DDSQ.

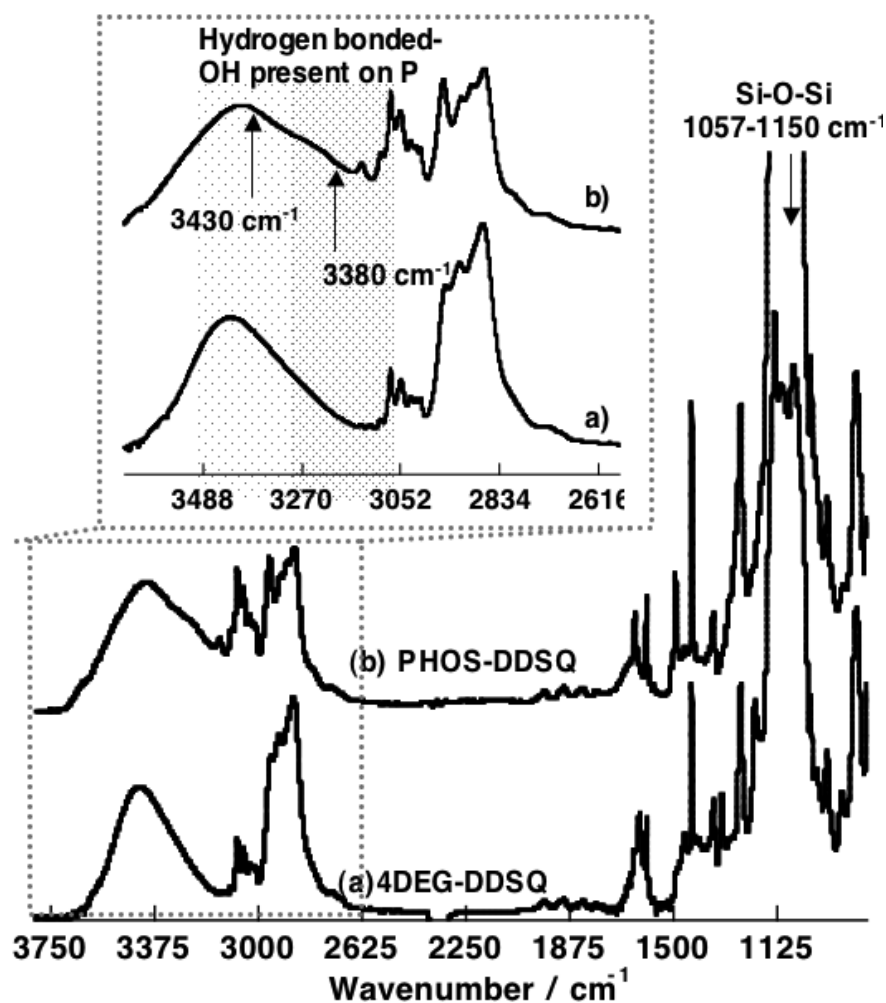

**Figure S2.** FT-IR spectra recorded at room temperature in the  $800-3800\ \text{cm}^{-1}$  region for (a) 4DEG-DDSQ, (b) PHOS-DDSQ.

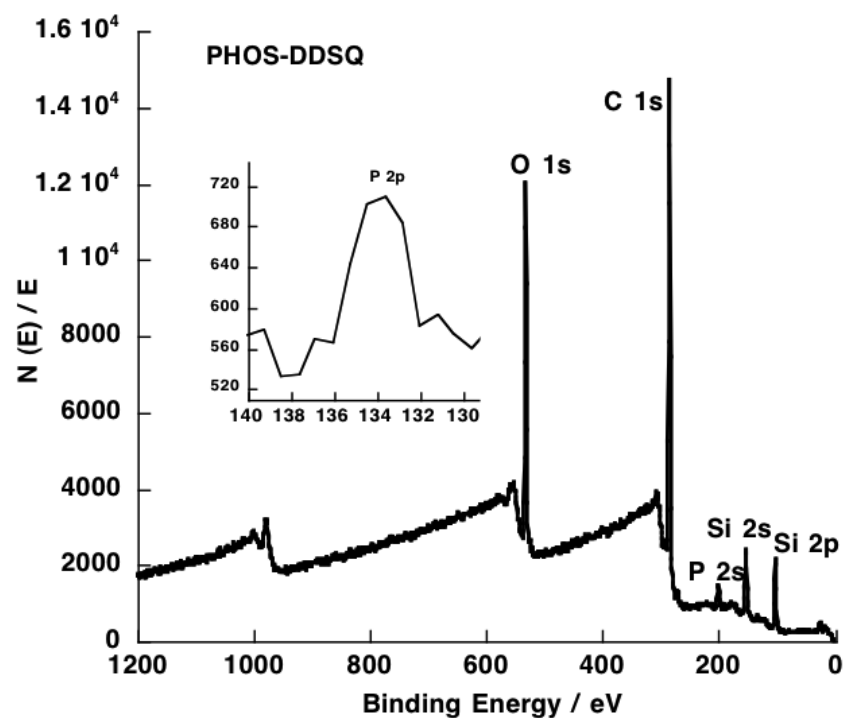

**Figure S3.** XPS spectrum of PHOS-DDSQ.

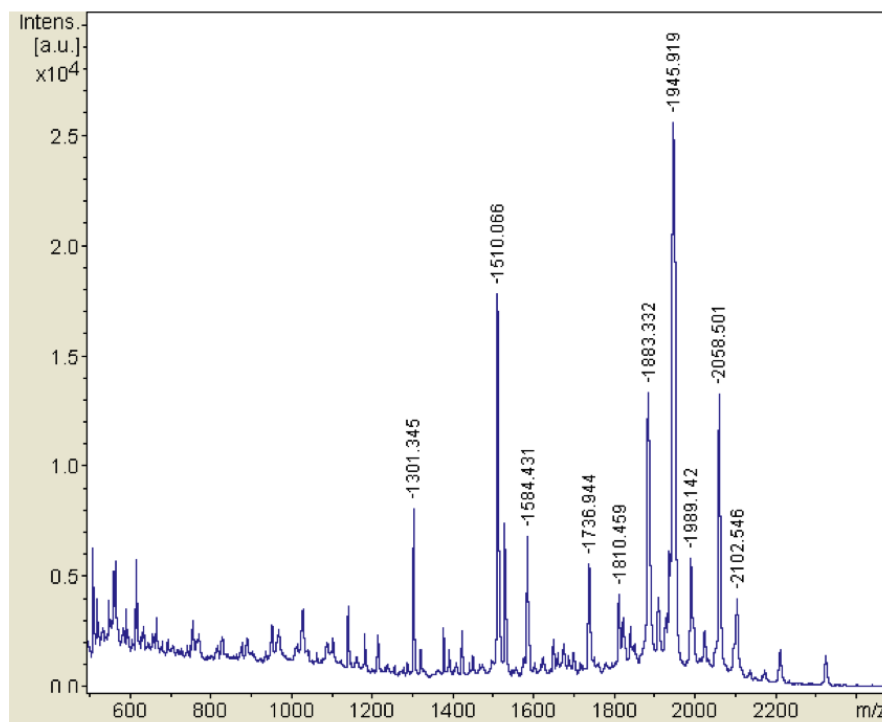

**Figure S4.** Maldi-Tof spectrum of PHOS-DDSQ

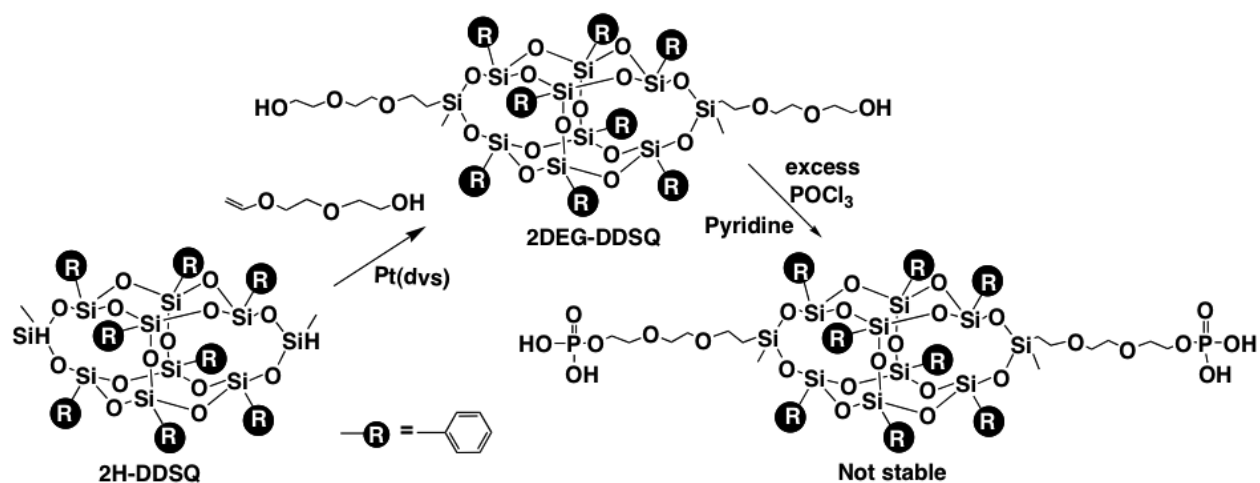

**Figure S5.** Synthesis of phosphonic acid functionalized two armed DDSQ
